# Supplementary material
Source: publisher figshare collection journal article supplement (https://acs.figshare.com/ndownloader/files/3707479)

Supplementary Information for  
**Toward a Physically-Motivated Force Field: Hydrogen Bond Directionality from a Symmetry-Adapted Perturbation Theory Perspective**  
 by Maxim Tafipolsky, Kay Ansorg

Additional Results

**A.** Exchange-repulsion energy contributions from the fit to a simple exponential function ( $A \cdot \exp(-B \cdot R)$ ) and from valence electron density overlap integrals against the corresponding DFT-SAPT reference data.

Table: Parameters for the exchange-repulsion energy term

| Atom class | A, kcal/mol* | B, 1/Å** |
|------------|--------------|----------|
| O          | 0.2719       | 3.662    |
| H          | 0.0011       | 3.240    |

\* The geometric mean combination rule is used for the unlike atoms.

\*\* The harmonic mean combination rule is used for the unlike atoms.

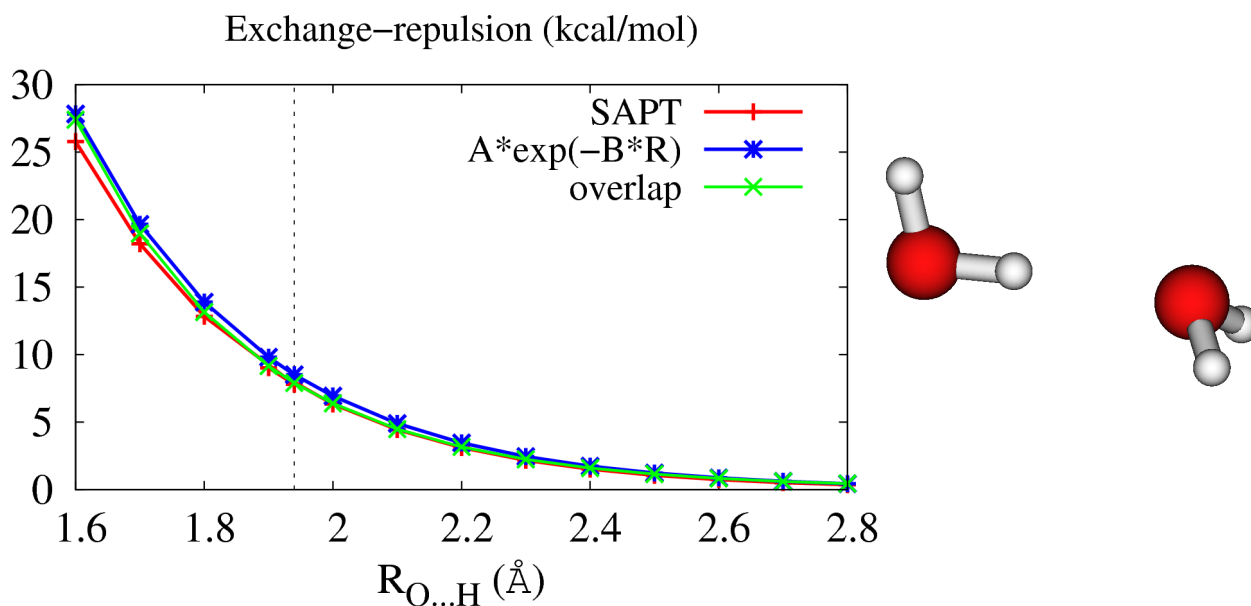

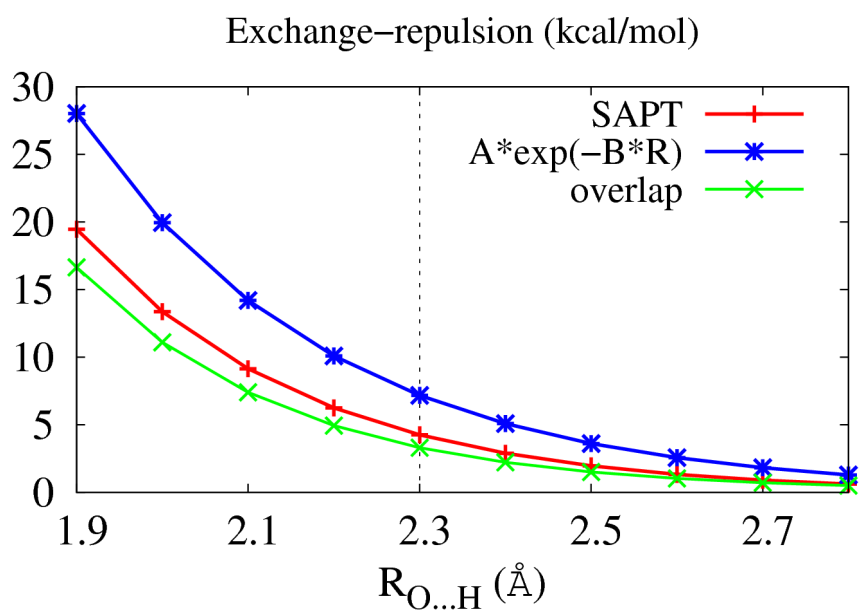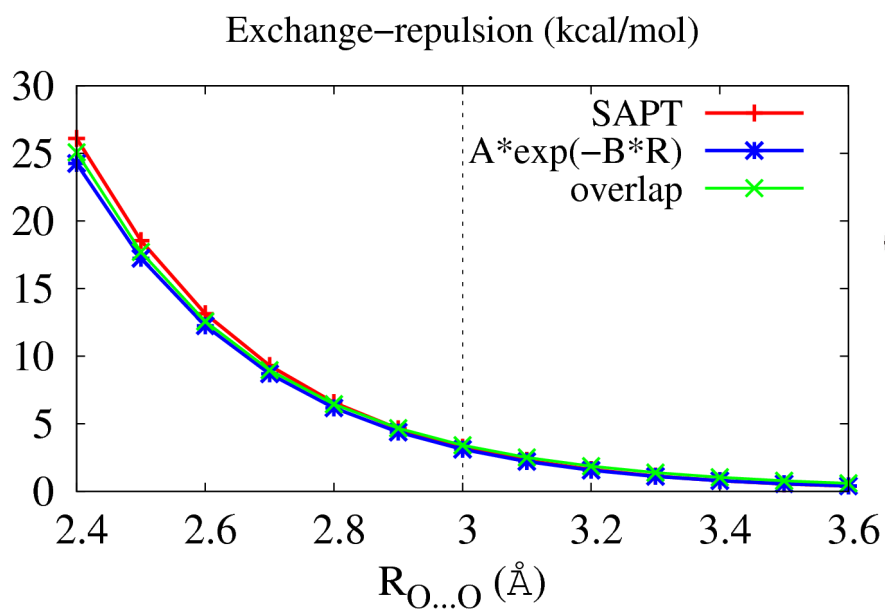

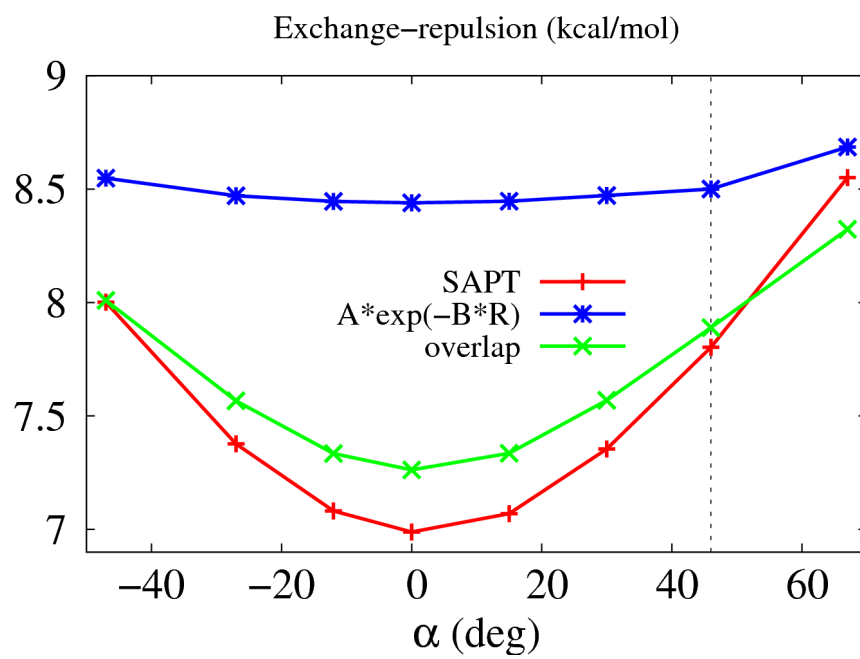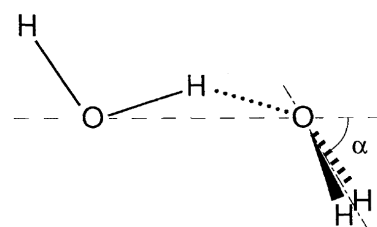

**B.** Total interaction energy: DFT-SAPT/aug-cc-pVQZ against CCSD(T)/aug-cc-pVQZ.

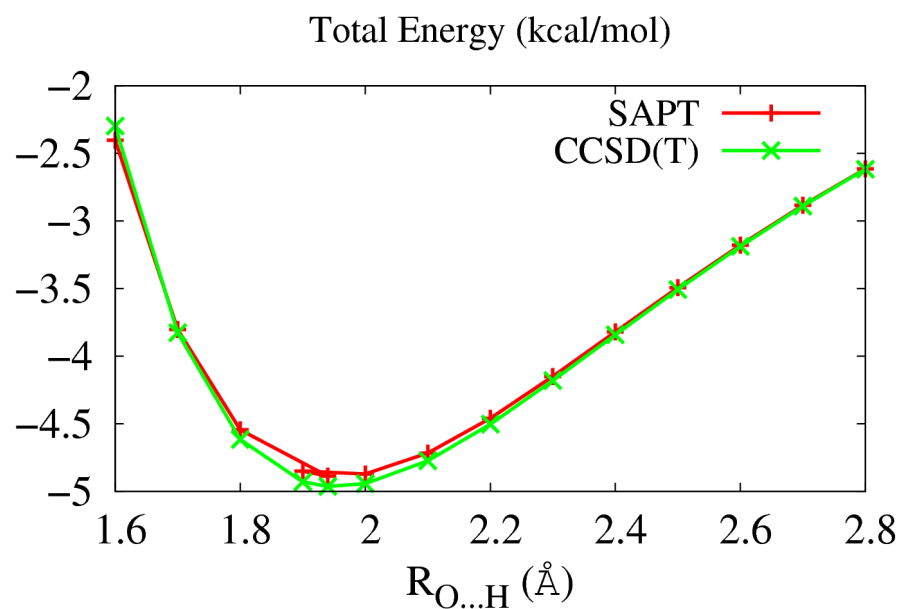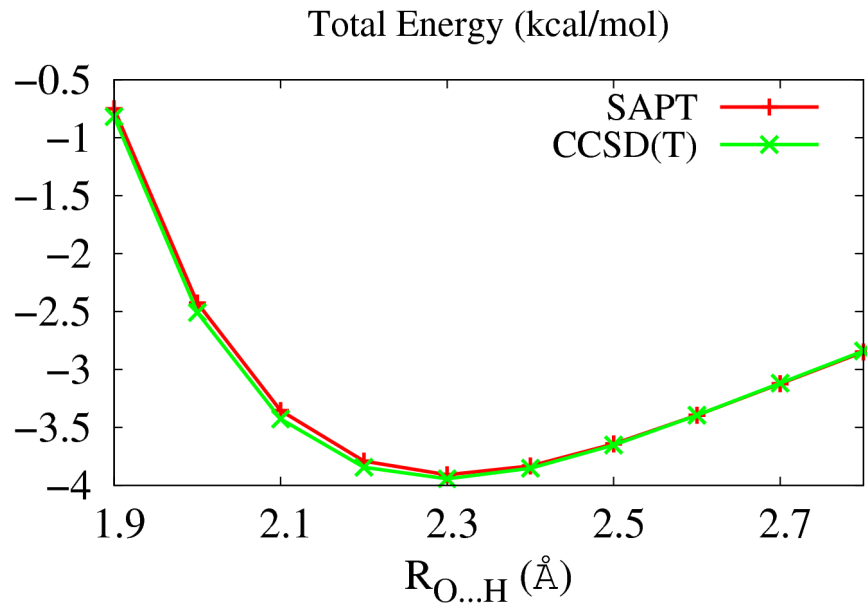

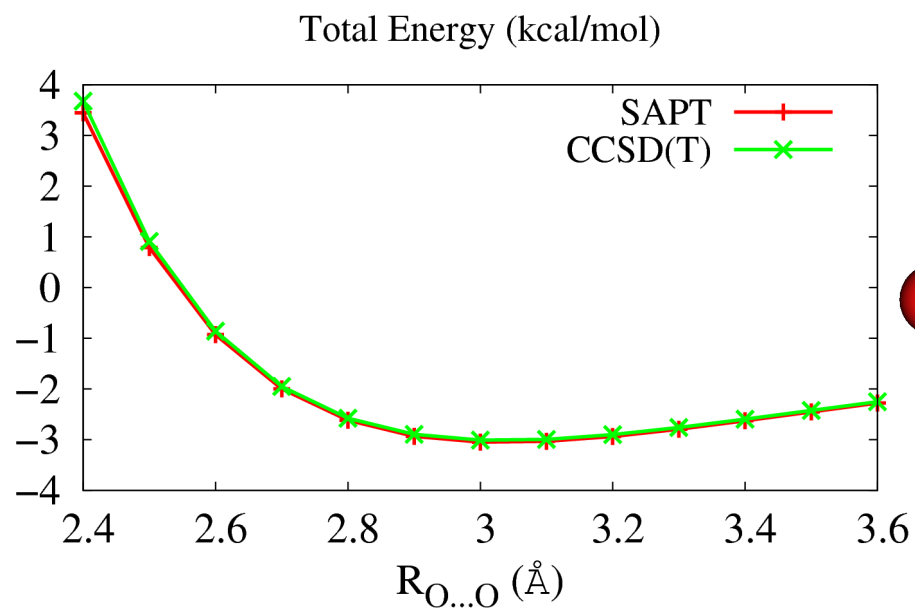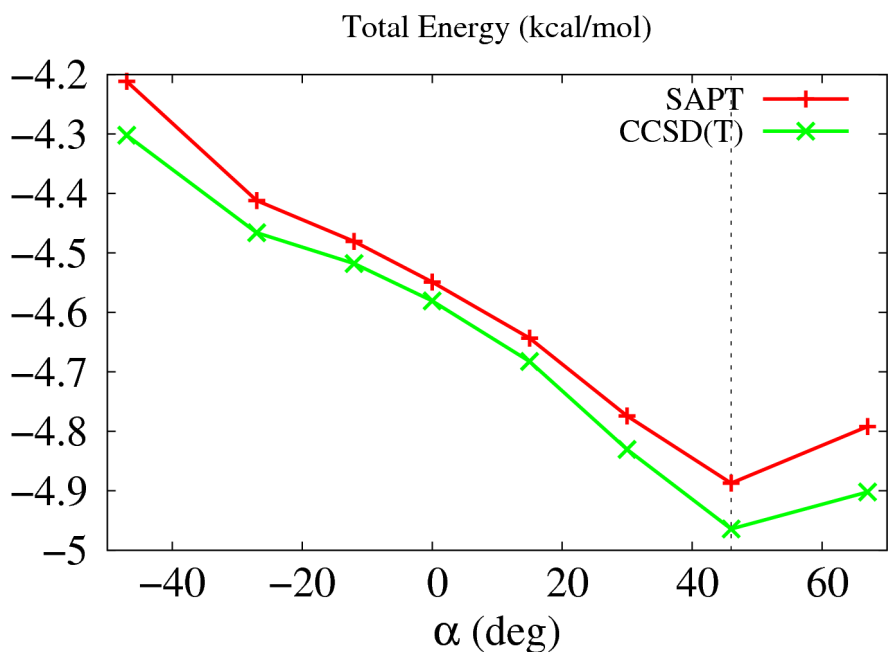

Supplement: Supplementary file 1 [file 3707479]
